Anesthesiology  
1996; 84:322-9  
© 1996 American Society of Anesthesiologists, Inc.  
Lippincott-Raven Publishers

## Comparison of the Segregation of the RYR1 C1840T Mutation with Segregation of the Caffeine/Halothane Contracture Test Results for Malignant Hyperthermia Susceptibility in a Large Manitoba Mennonite Family

Kimberly D. Serfas, B.Sc.,\* Deepak Bose, M.D. Ph.D.,† Leena Patel, M.D.,‡ Klaus Wrogemann, M.D., Ph.D.,§ Michael S. Phillips, B.Sc.,|| David H. MacLennan, Ph.D.,# Cheryl R. Greenberg, M.D., C.M.\*\*

**Background:** Malignant hyperthermia (MH) is an important cause of anesthesia-induced death. Malignant hyperthermia

This article is accompanied by a Highlight. Please see this issue of ANESTHESIOLOGY, page 29A.

\* Graduate Student, Department of Human Genetics, University of Manitoba.

† Professor, Departments of Pharmacology and Therapeutics, Anesthesiology, and Internal Medicine, University of Manitoba.

‡ Associate Professor, Department of Anesthesiology, University of Manitoba.

§ Professor, Departments of Biochemistry and Molecular Biology and Human Genetics, University of Manitoba.

|| Graduate Student, Banting and Best Department of Medical Research, University of Toronto.

# University Professor, Banting and Best Department of Medical Research, University of Toronto.

\*\* Professor, Departments of Pediatrics and Child Health and Human Genetics, University of Manitoba.

Received from the Departments of Human Genetics, Pediatrics and Child Health, Biochemistry and Molecular Biology, Pharmacology and Therapeutics, and Anesthesiology, University of Manitoba, Winnipeg, Manitoba, and Banting and Best Department of Medical Research, University of Toronto, Toronto, Canada. Submitted for publication May 11, 1995. Accepted for publication October 19, 1995. Dr. Greenberg and Dr. Wrogemann were supported by grants from the Children's Hospital of Winnipeg Research Foundation of Manitoba. Dr. Greenberg, Dr. Wrogemann, and Dr. MacLennan were supported by the Muscular Dystrophy Association of Canada. Dr. Greenberg and Dr. MacLennan were supported by the Canadian Genetics Diseases Network of Centres of Excellence. Mr. Phillips is a predoctoral fellow of the Medical Research Council of Canada.

Address reprint requests to Dr. Greenberg: Department of Human Genetics, University of Manitoba, 770 Bannatyne Avenue, Winnipeg, Manitoba, Canada, R3E 0W3. Address electronic mail to: greenbec@bldghsc.lan1.UManitoba.ca.

susceptibility is diagnosed using the *in vitro* caffeine/halothane contracture test (CHCT) in fresh muscle biopsy specimens. The CHCT test is highly invasive, expensive, and lacks 100% specificity. Genetic and biochemical evidence provide strong support for the view that the substitution of cysteine for arginine 614 (Arg614Cys) in the human ryanodine receptor gene is one of several mutations that are likely to cause human MH. DNA testing was compared with CHCT as a means of predicting MH susceptibility in a large MH family in which the Arg614Cys mutation was detected.

**Methods:** A comparison of CHCT and DNA-based diagnosis was conducted in a large Manitoba Mennonite MH kindred identified by an index patient who died at age 45 yr of an MH crisis after general anesthesia. The presence of the Arg614Cys mutation was detected through a combination of polymerase chain reaction and restriction endonuclease digestion. Blood samples for DNA analysis were obtained from 68 family members, including 19 who had undergone muscle biopsies and 1 who had a documented crisis but did not undergo biopsy. Family members were classified as MH-susceptible or MH-normal on the basis of the CHCT.

**Results:** Twenty-two persons were found to be heterozygous for the Arg614Cys mutation. Five of these persons had prior positive CHCT results and one had an MH crisis but did not undergo biopsy. On DNA testing, 44 persons were found to be homozygous for the normal allele. Of these, ten had been classified as MH-normal and five as MH-susceptible on the basis of the CHCT. On reevaluation of the data obtained in our earlier CHCT diagnoses, we found that the condition of the muscle was poor, with no twitch, for three of five individuals homozygous for the normal allele but originally classified as MH-susceptible and for one who was homozygous for the normal allele and originally classified as MH-normal. Caffeine/halothane contracture test results for these four persons were considered invalid. The twitch response was good for the two remaining persons who were homozygous for the normal allele but classified as MH-susceptible, because contracture was observed with appropriately low levels of both caffeine and halothane.

**Conclusions:** An absolute correlation between DNA test results and CHCT assignment could not be made in this kindred. Possible explanations for discordance are that the Arg614Cys mutation is not linked to MH, that a second MH mutation is

RYR1 C1840T MUTATION

segregating in the family, or because there is strong evidence of the Arg614Cys mutation, closely related within the pedigree. MH mutation were segregating accurately, we propose that the DNA test results and CHCT as from two false-positive diagnoses. Anesthetics, volatile: halothane test. Calcium release channel: malignant hyperthermia susceptibility. Neuromuscular blocking agent: mutation testing.)

MALIGNANT hyperthermia is a skeletal muscle disorder of anesthesia-induced degenerated anesthetics such as paralyzing neuromuscular line, can trigger MH crisis persons.

A principal objective identify MHS individuals anesthetics so that alternative depolarizing muscle relaxants hyperthermia susceptibility the *in vitro* caffeine (CHCT) on fresh muscle test is that contracture of MHS persons are more halothane<sup>4</sup> than fibers from decades since the CHCT recommended standards for a both North America<sup>5</sup> and

The CHCT has proven When it is carefully executed points are used, the test is defined by Larach<sup>6</sup> as the results in the diseased population the formula:  $100 \times [\text{true-negative} / (\text{true-negative} + \text{false-negative})]$ , and 53% Larach<sup>7</sup> as the percentage absence of disease and  $100 \times [\text{true-negative} / (\text{true-negative} + \text{false-negative})]$ . Because failure to in a serious or fatal outcome 100% is more important specificity.<sup>7</sup> In spite of lack of 100% specificity as a predictor of phenotype normality, MH. The CHCT and therefore is not a predictor

# RYR1 C1840T MUTATION IN MALIGNANT HYPERTHERMIA

segregating in the family, or that there are errors in the CHCT. Because there is strong evidence supporting the causal nature of the Arg614Cys mutation, the discordant persons are not closely related within the pedigree as they would be if a second MH mutation were segregating, and the CHCT is not 100% accurate, we propose that the observed discordance between DNA test results and CHCT assignment in this kindred results from two false-positive diagnoses by the CHCT. (Key words: Anesthetics, volatile: halothane. Caffeine/halothane contracture test. Calcium release channel (ryanodine receptor). Malignant hyperthermia susceptibility testing. Mutation analysis. Neuromuscular blocking agent: succinylcholine. RYR1 C1840T mutation testing.)

MALIGNANT hyperthermia (MH) is an inherited human skeletal muscle disorder and is one of the main causes of anesthesia-induced death.<sup>1,2</sup> Commonly used halogenated anesthetics, such as halothane, and the depolarizing neuromuscular blocking agent, succinylcholine, can trigger MH crises in MH-susceptible (MHS) persons.

A principal objective of MH research has been to identify MHS individuals before administration of anesthetics so that alternative, safe anesthetics and nondepolarizing muscle relaxants can be used. Malignant hyperthermia susceptibility is currently diagnosed using the *in vitro* caffeine halothane/contracture test (CHCT) on fresh muscle biopsies. The basis for this test is that contracture of skeletal muscle strips from MHS persons are more sensitive to caffeine<sup>3</sup> or halothane<sup>4</sup> than fibers from normal persons. In the two decades since the CHCT was first developed, recommended standards for a positive CHCT have evolved in both North America<sup>5</sup> and Europe.<sup>6</sup>

The CHCT has proven to be a valuable clinical test.<sup>7</sup> When it is carefully executed and appropriate cutoff points are used, the test achieves 92–95% sensitivity,<sup>8,9</sup> defined by Larach<sup>7</sup> as the percentage of positive test results in the diseased population and calculated from the formula:  $100 \times [\text{true-positives}/(\text{true-positives} + \text{false-negative})]$ , and 53–75% specificity, defined by Larach<sup>7</sup> as the percentage of negative test results in the absence of disease and calculated from the formula:  $100 \times [\text{true-negative}/(\text{true-negatives} + \text{false-positives})]$ . Because failure to detect MHS persons can result in a serious or fatal outcome, sensitivity approaching 100% is more important for clinical diagnosis than specificity.<sup>7</sup> In spite of its value as a clinical test, the lack of 100% specificity in the CHCT reduces its value as a predictor of phenotypic carriers of the genetic abnormality, MH. The CHCT is invasive and expensive and therefore is not a practical screen for all patients

before general anesthesia. Thus, there is a need for a reliable, inexpensive, and noninvasive test for MH susceptibility.<sup>2</sup>

A primary MH defect has been proposed to involve abnormal gating of the calcium release channel (ryanodine receptor) of human and porcine skeletal muscle sarcoplasmic reticulum.<sup>10–16</sup> Genetic studies also support RYR1, the gene encoding the skeletal muscle isoform of the ryanodine receptor, as a causal gene for MH in humans<sup>17–26</sup> and porcine stress syndrome in pigs.<sup>27–28</sup> In the MHS pig, the substitution of T for C at position 1843 in RYR1, resulting in the substitution of cysteine for arginine 615 in the ryanodine receptor, was the only amino acid difference detected in a comparison with a normal animal.<sup>27</sup> This mutation cosegregated with MHS in more than 450 animals from 6 breeds of selectively inbred pigs with a lod score of 101.75 at a recombination fraction  $\theta = 0.00$ .<sup>28</sup> This strongly implicated it as the causal mutation for porcine MH. The corresponding human C1840T mutation (Arg614Cys) has been linked to MH in unrelated families.<sup>19,20</sup> The mutation, located in exon 17 of RYR1, eliminates a *RsaI* restriction endonuclease site, providing the basis for diagnosis of at-risk individuals.<sup>19</sup>

Linkage of MH to RYR1 has been possible in only 30–50% of all cases studied<sup>29</sup> and, in one case, lack of linkage of the Arg614Cys mutation to MH was reported in a complex MH family.<sup>30</sup> There are at least three possible reasons why the Arg614Cys mutation or other RYR1 mutations may not segregate with MH in all cases. First, there may be no linkage. Second, more than one MH allele may be segregating in the family. Third, there may be linkage, but inaccurate phenotypic assessment may prevent the demonstration of linkage.

In a screen of our own series of 15 unrelated patients from our Manitoba probands with an MH crisis or positive CHCT, one person was heterozygous for the Arg614Cys mutation. This person belongs to a very large pedigree of Mennonite descent. In this study, we have compared the inheritance of the Arg614Cys mutation with inheritance of the MHS or MH-normal (MHN) phenotype, as defined by CHCT.

## Methods

### Patients and Caffeine/Halothane Contracture Testing

The index patient (III-2) in this large Manitoba family of Mennonite descent died at the age of 45 yr of an MH



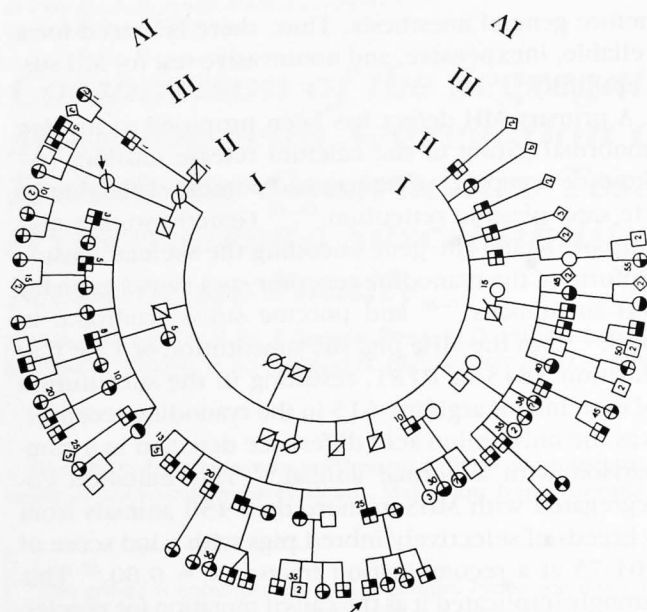

Fig. 1. Partial pedigree of large Manitoba kindred with 2 persons (♂) with documented malignant hyperthermia crisis. (⊕) = malignant hyperthermia normal by CHCT; (⊗) = malignant hyperthermia susceptible by CHCT; (⊙) = malignant hyperthermia status by CHCT unknown; (⊕) = C1840T mutation present; (⊖) = C1840T mutation absent; (○) = not studied. Numbers inside symbols refer to number of persons. Numbers to the upper left of symbol refer to pedigree position in each generation.

crisis after administration of a general anesthetic (fig. 1). She was admitted to the hospital for a left oophorectomy in 1979. There was no previous history of adverse anesthetic reactions. She was anesthetized with thiopental, nitrous oxide, succinylcholine, and halothane. Toward the end of her 2-h laparotomy, she was noted to be hypotensive, hyperthermic (40.5°C), and hypertonic. Her skin was mottled and her urine was red. She developed disseminated intravascular coagulation, renal failure, and cardiogenic shock. She never regained consciousness and died 1 day postoperatively. Subsequently, a second person (IV-38) was identified as having survived an MH crisis. This 3-yr, 10-month-old boy developed generalized muscle rigidity and cyanosis after administration of succinylcholine, nitrous oxide, and halothane for a right inguinal hernia repair. Myoglobinuria was documented and his creatine kinase level increased to 18,000 U/L the next day. He recovered uneventfully after supportive management.

Approximately 126 persons in this family are known to be at a 50% or 25% risk for MHS. Standardized open biopsy of the vastus lateralis muscle was performed in

21 at-risk persons during the period 1986 to present. One person, III-8, had 2 biopsies. These muscle biopsy specimens were studied using standard histochemistry and CHCT protocols of the North American Group and Registry.<sup>5</sup> Caffeine/halothane testing criteria have changed during the past 9 yr and those criteria used in Manitoba during that time are listed in table 1. Family members are classified as MHS, or MHN on the basis of results of the CHCT. In accordance with North American Standards, patients responding to caffeine or halothane, but not both, are included in the MHS category, as C or H responders.

#### Mutation Analysis

Blood samples for DNA extraction were obtained from 68 family members, including 19 of the 21 persons who had undergone muscle biopsies and one who had a documented crisis. Genomic DNA was isolated from whole blood as described previously.<sup>31</sup> The presence of the C1840T mutation in human genomic DNA was detected through a combination of polymerase chain reaction and restriction endonuclease digestion as described.<sup>32</sup>

#### Results

The pedigree of our MH family is presented in figure 1. Since subject III-2, who died after a documented MH crisis, was maternally related to subject IV-38, who also experienced an MH crisis, the maternal relatives of III-2 were all presumed to be at risk for MH. Subject III-3 was the first in this kindred to be identified as heterozygous for the *RsaI* polymorphism. Direct DNA sequencing confirmed that the loss of the *RsaI* site was the result of a C1840 to T transition (data not shown). In all, 22 persons were found to be heterozygous for the C1840T mutation. Of these, five (III-3, III-12, III-21, III-23, and III-25) had prior positive CHCT results and one (IV-38) had an MH crisis.

Table 1. Positive Caffeine/Halothane Contracture Testing Criteria

| Criteria                                 | Years Used   |
|------------------------------------------|--------------|
| ≥0.2 g tension with 2% halothane alone   | Before 1987  |
| ≥0.5 g tension with 3% halothane         | 1987-present |
| ≥1.0 g tension with 4 mm caffeine (CSC)  | 1987-present |
| ≥0.2 g tension with 2 mm caffeine (CAFF) | 1987-present |

Table 2. Malignant Hyperthermia

| ID No. | Date of Biopsy |
|--------|----------------|
| III-3  | 22/5/87        |
| III-5  | 9/12/91        |
| III-8  | 12/5/89        |
|        | 4/6/92         |
| III-12 | 24/8/93        |
| III-21 | 20/2/90        |
| III-23 | 7/12/90        |
| III-25 | 21/1/86        |
| III-30 | 14/12/92       |
| III-31 | 12/5/92        |
| III-38 | 5/5/83         |
| III-40 | 28/8/92        |
| III-44 | 11/5/93        |
| IV-1   | 4/6/86         |
| IV-5†  | 8/12/87        |
| IV-18  | 21/3/90        |
| IV-19  | 6/12/89        |
| IV-38  | No biopsy      |
| IV-43  | 7/4/89         |
| IV-51  | 26/8/86        |
| IV-52  | 13/5/86        |

CSC = concentration of caffeine to produce 0.5 g of poor muscle quality; + C1840T mutation.

\* Abnormal test result.

† Done in Calgary.

Forty-four subjects were found to be homozygous for the normal allele. Of these, 19 had undergone muscle biopsies, resulting in the initial classification of 19 (III-3, III-5, III-8, III-12, III-21, III-23, III-25, III-30, III-31, III-38, III-40, III-44, IV-1, IV-5, IV-18, IV-19, IV-38, IV-43, IV-51, IV-52) as MHN. The condition of his muscle biopsies, however, was poor, with CHCT results are consistent with his normal DNA test results. The condition of his muscle biopsies, however, was poor, with CHCT results are consistent with his normal DNA test results. The condition of his muscle biopsies, however, was poor, with CHCT results are consistent with his normal DNA test results.

The two other CHCT-positive subjects (III-5 and IV-43) remain

## RYR1 C1840T MUTATION IN MALIGNANT HYPERTHERMIA

Table 2. Malignant Hyperthermia Status Based on CHCT and DNA Tests

| ID No. | Date of Biopsy | Twitch Quality | 2% Halothane (g) | 3% Halothane (g) | CSC (mm) | CAFF (g) | MH Status |     |
|--------|----------------|----------------|------------------|------------------|----------|----------|-----------|-----|
|        |                |                |                  |                  |          |          | CHCT      | DNA |
| III-3  | 22/5/87        | Good           | 0                | —                | 1.8*     | 1*       | MHS       | +   |
| III-5  | 9/12/91        | Good           | 0.5*             | 3.9*             | 2.1*     | 0.8*     | MHS       | —   |
| III-8  | 12/5/89        | Poor           | 0                | 3.6*             | 4.18     | 0.1      | Unknown   | —   |
|        | 4/6/92         | Good           | 0                | 0.35             | 4.49     | 0        | MHN       | —   |
| III-12 | 24/8/93        | Good           | 0.5*             | 1.4*             | 1.46*    | 1.4*     | MHS       | +   |
| III-21 | 20/2/90        | Good           | 3.8*             | 7.6*             | 1.53*    | 1.1      | MHS       | +   |
| III-23 | 7/12/90        | Good           | 3.2*             | 8.6*             | 1.71*    | 0.9*     | MHS       | +   |
| III-25 | 21/1/86        | Good           | 0                | —                | 3.27*    | 0.6*     | MHS       | +   |
| III-30 | 14/12/92       | Good           | 0                | 0.4              | 4.95     | 0        | MHN       | —   |
| III-31 | 12/5/92        | Poor           | 0                | 0                | 2.72*    | 0        | Unknown   | +   |
| III-38 | 5/5/83         | Poor           | 0                | —                | 2.98*    | 0.65*    | unknown   | +   |
|        |                |                |                  |                  | 2.58*    | 0.75*    |           |     |
| III-40 | 28/8/92        | Good           | 0                | 0                | 5.25     | 0        | MHN       | —   |
| III-44 | 11/5/93        | Good           | 0                | 0                | 4.22     | 0        | MHN       | —   |
| IV-1   | 4/6/86         | Poor           | 0                | —                | —        | 0        | Unknown   | —   |
| IV-5†  | 8/12/87        | —              | —                | 0.3 (4%)         | 16       | —        | MHN       | —   |
| IV-18  | 21/3/90        | Good           | 0                | 0.3              | 7.9      | 0.1      | MHN       | —   |
| IV-19  | 6/12/89        | Good           | 0                | 0                | 4.4      | 0        | MHN       | —   |
| IV-38  | No biopsy      | —              | —                | —                | —        | —        | Crisis    | +   |
| IV-43  | 7/4/89         | Good           | —                | 0.75             | 3.0      | 0.65     | MHS       | —   |
| IV-51  | 26/8/86        | Good           | 0.15             | 0                | 16       | —        | MHN       | —   |
| IV-52  | 13/5/86        | Good           | 0                | —                | 8.14     | 0        | MHN       | —   |

CSC = concentration of caffeine to produce 1 g of tension; CAFF = contraction produced with 2 mm caffeine; Unknown = status could not be assessed because of poor muscle quality; + = C1840T mutation present; — = C1840T mutation absent.

\* Abnormal test result.

† Done in Calgary.

Forty-four subjects were found, on DNA testing, to be homozygous for the normal allele. Of these, 14 had undergone muscle biopsies and CHCT (table 2), resulting in the initial classification of 9 (III-30, III-40, III-44, IV-1, IV-5, IV-18, IV-19, IV-51, IV-52) as MHN and 5 (III-5, III-8, III-31, III-38, IV-43) as MHS. Re-evaluation of all of our CHCT data, including the discrepancies, however revealed that all muscle strips from the biopsies of discordant subjects III-8, III-31 and III-38, as well as the biopsy for concordant subject IV-1, were poor, with no twitch. Accordingly, these CHCT results are considered invalid and the MH status of these persons is considered to be unknown. Subject III-8, however, underwent a repeat biopsy in 1992. The condition of his muscle strips was excellent and his CHCT assignment was clearly MHN, in agreement with his normal DNA test (table 2). The reassignments of III-31, III-38, and IV-1 from MHS to unknown and of III-8 from MHS to MHN, are reflected in figure 1 and table 2.

The two other CHCT-positive, DNA-negative subjects (III-5 and IV-43) remain problematic. Subject III-5,

analyzed in 1991, generated a strong contracture response of 3.9 g tension with 3% halothane, greater than 1 g tension with less than 4 mm caffeine and greater than 0.2 g tension with 2 mm caffeine, resulting in his classification as MHS. Subject IV-43, biopsied in 1989, generated a contracture response of 0.75 g tension with 3% halothane, 0.65 g tension with 2 mm caffeine, and greater than 1 g tension with less than 4 mm caffeine, resulting in her classification as MHS.

We have determined the haplotypes for siblings III-3, III-5, III-8, and their mother, and deduced the haplotype of their father, using *RYR1* intragenic and flanking markers. The data presented in figure 2 show that subject III-3, who is MHS by both DNA and CHCT, inherited a deduced haplotype, p1, from his presumed MHS father, subject II-4, whereas MHN subject III-8, who is MHN by both DNA and CHCT, inherited the deduced normal p2 haplotype. Subject III-5 is MHS by CHCT, but inherited the p2 haplotype, including the absence of the C1840T mutation, like his normal brother. Thus, the possibility that the C1840T mutation is not a causal mutation, but is only tightly linked to





## RYR1 C1840T MUTATION IN MALIGNANT HYPERTHERMIA

of standardizing CHCT procedures and establishing diagnostic cutpoints.<sup>7-9</sup> In their studies, current diagnostic cutpoints can achieve sensitivities approaching 100%, but specificities approaching only 80% (M. Larach, personal communication). The European Malignant Hyperthermia group have not published error rates for their CHCT protocol, but members of their group have acknowledged that the test is not 100% accurate.<sup>33</sup> False-negative test results have been reported for the European CHCT protocol.<sup>34</sup>

In light of our own experiences, in particular, the finding that rebiopsy can lead to a reversal of a test outcome, and in the face of clear evidence that the CHCT is not 100% sensitive, we are unable to define the CHCT as 100% accurate. Accordingly, we are unable to accept the alternative that the Arg614Cys mutation is not linked to MH in this family. We are, however, able to accept the alternative that the CHCT is giving rise to 2 false-positive results in our study of 16 CHCT results. Family members were told the results of their DNA tests but were counseled that their genotype data must be interpreted cautiously, at least until we more fully understand the basis for false-positive CHCT results.

Our study can be compared with one by Deufel *et al.*<sup>30</sup> of a very complex MH family. In this family, two Arg614Cys mutations were found on two different haplotypes in one branch of the MH family. Malignant hyperthermia susceptibility also segregated in another branch of the family in which no Arg614Cys mutation was present. Caffeine/halothane contracture test results for MH susceptibility segregated with the presence or absence of the Arg614Cys mutations in seven of the eight persons tested in the left branch of the family, including one who was homozygous for the mutation. Subject 508, however, was negative in the CHCT, but heterozygous for the mutation. To achieve concordance in this branch of the family, Deufel *et al.*<sup>30</sup> would have had to accept that subject 508 was diagnosed as a false-negative by the CHCT. In the right branch of the family, the Arg614Cys mutation was absent, but an attempt was made to correlate CHCT results with chromosome 19q13.1 haplotypes. To achieve concordance in this branch of the family, one false-positive and one false-negative CHCT result, out of four tests carried out, would have had to be invoked. This would not be unreasonable if one accepts that the CHCT is not 100% accurate. An understanding of the inheritance of MH in this branch of the family will require further study.

In both our study and the study of Deufel *et al.*,<sup>30</sup> a high correlation (14 of 16 in our study; 7 of 8 in Deufel's study), but not concordance was found between CHCT- and DNA-based diagnoses for MH in families in which the Arg614Cys mutation was segregating. In our view, the CHCT is not 100% accurate and these results can be brought into concordance by the reasonable assumption that the CHCT can yield both false-positive and false-negative results. Deufel *et al.*,<sup>30</sup> however, suggested that their results threw into question both the causal nature of the Arg614Cys mutation and the role of *RYR1* in MH.

This study is not the first in which lack of concordance between *RYR1* mutations and MH have been noted. The Gly2433Arg mutation in *RYR1* was detected in eight MH families,<sup>22,26</sup> but was concordant with MH in only six. In one small family,<sup>26</sup> two brothers were diagnosed as MHS by the CHCT. One had exceptionally strong test results and carried the Gly2433Arg mutation. The other was well within the positive category, but did not carry the Gly2433Arg mutation. In the absence of further information, it is reasonable to suggest that the person with the strong CHCT result carried two MH mutations, while his brother carried only the one that was not detected in assays for the Arg2433 mutation. In the other discordant family,<sup>26</sup> inheritance patterns and haplotype analysis did not support a second MH mutation. As in the family currently being studied, it was most logical to invoke both false-positive and false-negative CHCT results as the basis for discordance.

It has been estimated that only 30–50% of MH families are linked to the *RYR1* gene.<sup>29</sup> Although linkage describes a probability, positive linkage requires concordance. Thus, discordance for even one member of a large family can lead to lack of linkage. That linkage analysis has been successful in identifying so many chromosome 19 linked families argues strongly that, in many cases, the CHCT is an accurate method of phenotyping for molecular genetic studies. Alternative loci for MH have been described on chromosomes 17q,<sup>35,36</sup> 7q,<sup>37</sup> and 3q13.1.<sup>38</sup> Linkage to chromosome 17q has not been confirmed.<sup>39</sup> Linkage to chromosome 7 was strongly suspected in a single family but the lod score for linkage was less than 3<sup>37</sup> and a causal gene and a causal mutation have yet to be found. Linkage to chromosome 3 with a lod score over 3 has been reported, making this locus the best candidate for a second MH locus.<sup>38</sup> Assignment of alternate loci using the CHCT, however, has its own potential for error. An



understanding of the limits of accuracy of the CHCT, in studies of the linkage of MH to *RYR1* and alternate loci, will be important to all future research on the genetic basis of MH.

The authors thank the family members who participated in this study, Dr. R. Postuma and Dr. N. Wiseman, who performed 19 muscle biopsies, Dr. K. Brownell, University of Calgary, for providing muscle biopsy and CHCT results in one patient, Teresa Chau, Ted Nylen, Cheryl Taylor, and Margaret Gibb for technical assistance, Barbara Triggs-Raine and Bernie Chodirker for valuable contributions, and Josie Diato and Lynne Wichenko for secretarial assistance.

## References

1. Britt BA: Malignant hyperthermia: A review, Thermoregulation: Pathology, Pharmacology and Therapy. Edited by Schonbaum E, Lomax P. New York, Pergamon, 1991, pp 179-292
2. MacLennan DH, Phillips MS: Malignant hyperthermia. *Science* 1992; 256:789-94
3. Kalow W, Britt BA, Terreau ME, Haist C: Metabolic error of muscle metabolism after recovery from malignant hyperthermia. *Lancet* 1970; 2:895-8
4. Ellis FR, Harriman DGF: A new screening test for susceptibility to malignant hyperpyrexia. *Br J Anaesth* 1973; 45:638
5. Larach MG: Standardization of the caffeine halothane muscle contracture test. North American Malignant Hyperthermia Group. *Anesth Analg* 1989; 69:511-5
6. European MH Group: Malignant hyperpyrexia: A protocol for the investigation of malignant hyperthermia susceptibility. *Br J Anaesth* 1984; 56:1267-9
7. Larach MG: Should we use muscle biopsy to diagnose malignant hyperthermia susceptibility? *ANESTHESIOLOGY* 1993; 79:1-4
8. Larach MG, Landis JR, Bunn JS, Diaz M: Prediction of malignant hyperthermia susceptibility in low-risk subjects. An epidemiologic investigation of caffeine halothane contracture responses. The North American Malignant Hyperthermia Registry. *ANESTHESIOLOGY* 1992; 76:16-27
9. Larach MG, Landis JR, Shirk SJ, Diaz M: Prediction of malignant hyperthermia susceptibility in man: Improving sensitivity of the caffeine halothane contracture test (abstract). *ANESTHESIOLOGY* 77:A1052, 1992
10. Endo M, Yagi S, Ishizuka T, Horiuti K, Koga Y, Amada K: Changes in the Ca-induced Ca release mechanism in sarcoplasmic reticulum from a patient with malignant hyperthermia. *Biomed Res* 1983; 4:83-92
11. Ohnishi ST, Taylor S, Gronert GA: Calcium-induced calcium release from sarcoplasmic reticulum of pigs susceptible to malignant hyperthermia. The effects of halothane and dantrolene. *FEBS Lett* 1983; 171:103-7
12. Fill M, Coronado R, Mickelson JR, Vilven J, Ma JJ, Jacobson BA, Louis CF: Abnormal ryanodine receptor channels in malignant hyperthermia. *Biophys J* 1990; 57:471-5
13. Fill M, Stefani E, Nelson TE: Abnormal human sarcoplasmic reticulum  $Ca^{2+}$  release channels in malignant hyperthermia skeletal muscle. *Biophys J* 1991; 59:1085-90
14. Otsu K, Nishida K, Kimura Y, Kuzuya T, Hori M, Kamada T, Tada M: The point mutation Arg615Cys in the  $Ca^{2+}$  release channel of skeletal sarcoplasmic reticulum is responsible for hypersensitivity to caffeine and halothane in malignant hyperthermia. *J Biol Chem* 1994; 269:9413-5
15. Treves S, Larini F, Menegazzi P, Steinberg TH, Koval M, Vilsen B, Andersen JP, Zorzato F: Alteration of intracellular  $Ca^{2+}$  transients in COS-7 cells transfected with the cDNA encoding skeletal-muscle ryanodine receptor carrying a mutation associated with malignant hyperthermia. *Biochem J* 1994; 301:661-5
16. Shomer NH, Louis CF, Fill M, Litterer LA, Mickelson JR: Reconstitution of abnormalities in the malignant hyperthermia-susceptible pig ryanodine receptor. *Am J Physiol* 1993; 264: C125-35
17. MacLennan DH, Duff C, Zorzato F, Fujii J, Phillips M, Korneluk RG, Frodis W, Britt BA, Worton RG: Ryanodine receptor gene is a candidate for predisposition to malignant hyperthermia. *Nature* 1990; 343:559-61
18. McCarthy TV, Healy JM, Heffron JJ, Lehane M, Deufel T, Lehmann-Horn F, Farrall M, Johnson K: Localization of the malignant hyperthermia susceptibility locus to human chromosome 19q12-13.2. *Nature* 1990; 343:562-4
19. Gillard EF, Otsu K, Fujii J, Khanna VK, De Leon S, Derdemezi J, Britt BA, Duff CL, Worton RG, MacLennan DH: A substitution of cysteine for arginine 614 in the ryanodine receptor is potentially causative of human malignant hyperthermia. *Genomics* 1991; 11: 751-5
20. Hogan K, Couch F, Powers PA, Gregg RG: A cysteine-for-arginine substitution (R614C) in the human skeletal muscle calcium release channel cosegregates with malignant hyperthermia. *Anesth Analg* 1992; 75:441-8
21. Quane KA, Healy JMS, Keating KE, Manning BM, Couch FJ, Palmucci LM, Doriguzzi C, Fagerlund TH, Berg K, Ording H, Bendixen D, Mortier W, Linz U, Mullerl CR, McCarthy TV: Mutations in the ryanodine receptor gene in central core disease and malignant hyperthermia. *Nature Genet* 1993; 5:51-5
22. Quane KA, Keating KE, Manning BM, Healy JM, Monsieurs K, Heffron JJ, Lehane M, Heytens L, Krivosic-Horber R, Adnet P, Ellis FR, Monnier N, Lunardi J, McCarthy TV: Detection of a novel common mutation in the ryanodine receptor gene in malignant hyperthermia: implications for diagnosis and heterogeneity studies. *Hum Mol Genet* 1994; 3:471-6
23. Quane KA, Keating KE, Healy JM, Manning BM, Krivosic-Horber R, Krivosic I, Monnier N, Lunardi J, McCarthy TV: Mutation screening of the *RYR1* gene in malignant hyperthermia: Detection of a novel Tyr to Ser mutation in a pedigree with associated central cores. *Genomics* 1994; 23:236-9
24. Gillard EF, Otsu K, Fujii J, Duff C, De Leon S, Khanna VK, Britt BA, Worton RG, MacLennan DH: Polymorphisms and deduced amino acid substitutions in the coding sequence of the ryanodine receptor (*RYR1*) gene in individuals with malignant hyperthermia. *Genomics* 1992; 13:1247-54
25. Zhang Y, Chen HS, Khanna VK, De Leon S, Phillips MS, Schaper K, Britt BA, Brownell AKW, MacLennan DH: A mutation in the human ryanodine receptor gene associated with central core disease. *Nature Genet* 1993; 5:46-50
26. Phillips MS, Khanna VK, De Leon S, Frodis W, Britt BA, MacLennan DH: The substitution of Arg for Gly<sup>2433</sup> in the human skeletal muscle ryanodine receptor is associated with malignant hyperthermia. *Hum Mol Genet* 1994; 3:2181-6
27. Fujii J, Otsu K, Zorzato F, De Leon S, Khanna VK, Weiler JE, O'Brien PJ, MacLennan DH: Identification of a mutation in porcine ryanodine receptor associated with malignant hyperthermia. *Proc Natl Acad Sci USA* 1991; 88:448-51
28. Otsu K, Khanna VK, Arora R, et al: Identification of a mutation in the porcine ryanodine receptor gene associated with malignant hyperthermia. *Genomics* 1991; 11: 111-5
29. Ball SP, Johnson KJ: The ryanodine receptor gene. *J Med Genet* 1993; 30:89-93
30. Deufel T, Sudbratt R, Fahlke K-L, Roewer N, Grimm T, Lehmann-Horn F: Discordance, in a malignant hyperthermia-susceptible family, between contracture-test phenotypes and chromosome 19q12-13.2, containing the *RYR1* gene. *Am J Hum Genet* 1993; 53:111-5
31. Greenberg CR, Hamer D, et al: Studies in a family with malignant hyperthermia susceptibility. *Am J Hum Genet* 1993; 53:111-5
32. Otsu K, Phillips MS, Krivosic-Horber R, et al: Refinement of diagnostic assays for malignant hyperthermia in porcine and human skeletal muscle. *ANESTHESIOLOGY* 1993; 79:5-10

## RYR1 C1840T MUTATION IN MALIGNANT HYPERTHERMIA

ryanodine receptor associated with malignant hyperthermia. *Science* 1991; 253:448-51

28. Otsu K, Khanna VK, Archibald AL, MacLennan DH: Cosegregation of porcine malignant hyperthermia and a probable causal mutation in the skeletal muscle ryanodine receptor gene in backcross families. *Genomics* 1991; 11:744-50

29. Ball SP, Johnson KJ: The genetics of malignant hyperthermia. *J Med Genet* 1993; 30:89-93

30. Deufel T, Sudbrak R, Feist Y, Rübsam B, Du Chesne I, Schäfer K-L, Roewer N, Grimm T, Lehmann-Horn F, Hartung EJ, Müller CR: Discordance, in a malignant hyperthermia pedigree, between *in vitro* contracture-test phenotypes and haplotypes for the MHS1 region on chromosome 19q12-13.2, comprising the C1840T transition in the *RYR1* gene. *Am J Hum Genet* 1995; 56:1334-42

31. Greenberg CR, Hamerton JL, Nigli M, Wrogemann K: DNA studies in a family with Duchenne muscular dystrophy and a deletion at Xp21. *Am J Hum Genet* 1987; 41:128-37

32. Otsu K, Phillips MS, Khanna VK, De Leon S, MacLennan DH: Refinement of diagnostic assays for a probable causal mutation for porcine and human malignant hyperthermia. *Genomics* 1992; 13:835-7

33. Hopkins PM, Halsall PJ, Ellis FR: Diagnosing malignant hyperthermia susceptibility. *Anaesthesia* 1994; 49:373-5

34. Isaacs H, Badenhorst M: False-negative results with muscle caffeine halothane contracture testing for malignant hyperthermia. *ANESTHESIOLOGY* 1993; 79:5-9

35. Levitt RC, Olckers A, Meyers S, Fletcher JE, Rosenberg H, Isaacs H, Meyers DA: Evidence for the localization of a malignant hyperthermia susceptibility locus (MHS2) to human chromosome 17q. *Genomics* 1992; 14:562-6

36. Olckers A, Meyers DA, Meyers S, Taylor EW, Fletcher JE, Rosenberg H, Isaacs H, Levitt RD: Adult muscle sodium channel  $\alpha$ -subunit is a gene candidate for malignant hyperthermia susceptibility. *Genomics* 1992; 14:829-31

37. Iles DE, Lehmann-Horn F, Scherer SW, Tsui LC, Weghuis DO, Suijkerbuijk RF, Heytens L, Mikala G, Schwartz A, Ellis FR, Stewart AD, Wieringa B: Localization of the gene encoding the  $\alpha 2/\delta$ -subunits of the L-type voltage-dependent calcium channel to chromosome 7q and analysis of the segregation of flanking markers in malignant hyperthermia susceptible families. *Hum Mol Genet* 1994; 3:969-75

38. Sudbrak R, Procaccio V, Klausnitzer M, Curran JL, Monsieurs K, Van Broeckhoven C, Ellis R, Heytens L, Hartung EJ, Kozak-Ribbens G, Heilinger D, Weissenbach J, Lehmann-Horn F, Mueller CR, Deufel T, Stewart AD, Lunardi J: Mapping of a further malignant hyperthermia susceptibility locus to chromosome 3q13.1. *Am J Hum Genet* 1995; 56:684-91

39. Sudbrak R, Golla A, Powers P, Gregg R, Du Chesne I, Lehmann-Horn F, Deufel T: Exclusion of malignant hyperthermia susceptibility (MHS) from a putative MHS2 locus on chromosome 17q and of the  $\alpha 1$ ,  $\beta 1$ ,  $\gamma$  subunits of the dihydropyridine receptor calcium channel as candidates for the molecular defect. *Hum Mol Genet* 1993; 2:857-62
